# Supplementary material for: COVID-19 vaccine BNT162b1 elicits human antibody and TH1 T cell responses
Source: Springer Nature journal article supplement (doi:10.1038/s41586-020-2814-7), 2020-09-30
Supplement: 41586_2020_2814_MOESM1_ESM.pdf [file 41586_2020_2814_MOESM1_ESM.pdf]

---

**Supplementary information**

---

**COVID-19 vaccine BNT162b1 elicits human antibody and T<sub>H</sub>1 T cell responses**

---

In the format provided by the authors and unedited

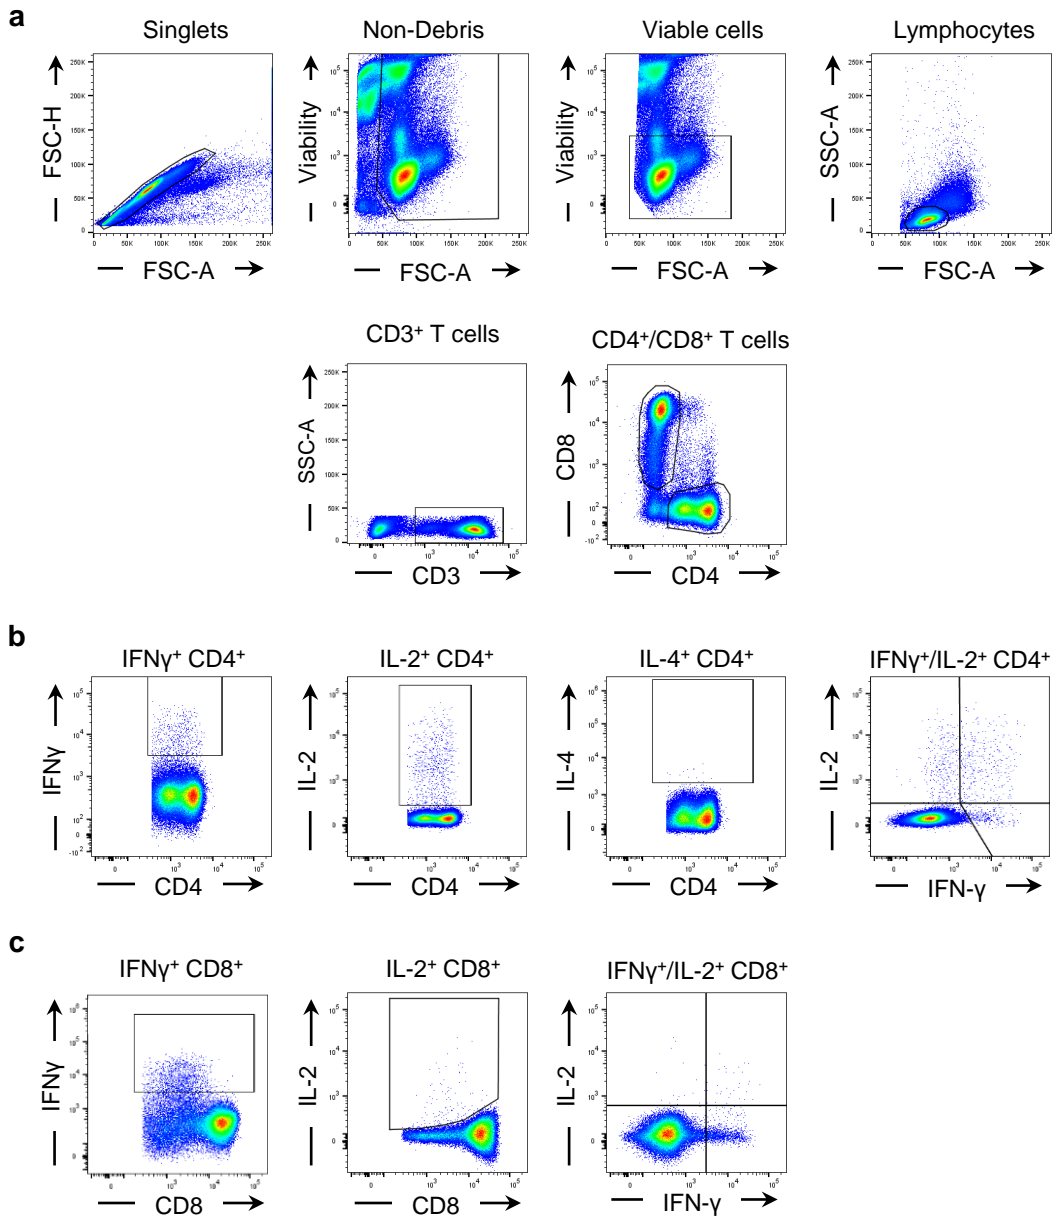

**Supplementary Figure 1 | Gating strategy for flow cytometry analysis of data shown in Figure 4.**

Flow cytometry gating strategy for identification of IFN $\gamma$ , IL-2 and IL-4 secreting T cells in study subject PBMC samples. **a**, CD4<sup>+</sup> and CD8<sup>+</sup> T cells were gated within single, viable lymphocytes. **b**, **c**, Gating of IFN $\gamma$ , IL-2 and IL-4 in CD4<sup>+</sup> T cells (**b**), and IFN $\gamma$  and IL-2 in CD8<sup>+</sup> T cells (**c**).
