# Supplementary material for: COVID-19 vaccine BNT162b1 elicits human antibody and TH1 T cell responses
Source: Springer Nature journal article supplement (doi:10.1038/s41586-020-2814-7), 2020-09-30
Supplement: 41586_2020_2814_MOESM2_ESM.pdf [file 41586_2020_2814_MOESM2_ESM.pdf]

## Reporting Summary

Nature Research wishes to improve the reproducibility of the work that we publish. This form provides structure for consistency and transparency in reporting. For further information on Nature Research policies, see [Authors & Referees](#) and the [Editorial Policy Checklist](#).

### Statistics

For all statistical analyses, confirm that the following items are present in the figure legend, table legend, main text, or Methods section.

n/a Confirmed

- The exact sample size ( $n$ ) for each experimental group/condition, given as a discrete number and unit of measurement
- A statement on whether measurements were taken from distinct samples or whether the same sample was measured repeatedly
- The statistical test(s) used AND whether they are one- or two-sided  
*Only common tests should be described solely by name; describe more complex techniques in the Methods section.*
- A description of all covariates tested
- A description of any assumptions or corrections, such as tests of normality and adjustment for multiple comparisons
- A full description of the statistical parameters including central tendency (e.g. means) or other basic estimates (e.g. regression coefficient) AND variation (e.g. standard deviation) or associated estimates of uncertainty (e.g. confidence intervals)
- For null hypothesis testing, the test statistic (e.g.  $F$ ,  $t$ ,  $r$ ) with confidence intervals, effect sizes, degrees of freedom and  $P$  value noted  
*Give  $P$  values as exact values whenever suitable.*
- For Bayesian analysis, information on the choice of priors and Markov chain Monte Carlo settings
- For hierarchical and complex designs, identification of the appropriate level for tests and full reporting of outcomes
- Estimates of effect sizes (e.g. Cohen's  $d$ , Pearson's  $r$ ), indicating how they were calculated

*Our web collection on [statistics for biologists](#) contains articles on many of the points above.*

### Software and code

Policy information about [availability of computer code](#)

#### Data collection

Flow cytometry data was collected using the FACS VERSE instrument (BD Biosciences) and FACSSuite software version 1.0.6 and analysed with FlowJo software version 10.5.3 (FlowJo LLC, BD Biosciences).  
ELISpot plates were scanned using an AID Classic Robot ELISPOT Reader and analysed by AID ELISPOT 7.0 software (AID Autoimmun Diagnostika).  
RBD binding IgG data were captured as median fluorescent intensities (MFIs) using a Luminex reader.  
For SARS-CoV-2 neutralisation assay, total cell counts per well were enumerated by nuclear stain (Hoechst 33342) and fluorescent virally infected foci were detected with a Cytation 7 Cell Imaging Multi-Mode Reader (Biotek) with Gen5 Image Prime version 3.09.  
For VSV-SARS-CoV-2 spike variant pseudovirus neutralisation assay, fluorescent foci were quantified using the SpectraMax i3 plate reader with MiniMax imaging cytometer (Molecular Devices).  
Cytokine profiles in PBMC supernatants were determined using a bead-based, 11-plex TH1/TH2 human ProcartaPlex immunoassay (Thermo Fisher Scientific) according to the manufacturer's instructions and fluorescence was measured with a Bioplex200 system (Bio-Rad).  
No custom software codes have been developed.

#### Data analysis

Flow cytometry data was analysed using FlowJo software version 10.5.3 (FlowJo LLC, BD Biosciences).  
ELISpot assays were analysed using AID ELISPOT 7.0 software (AID Autoimmun Diagnostika). T-cell responses stimulated by peptides were compared to T-cell responses stimulated with cell culture medium only as a negative control using an in-house ELISpot data analysis tool (EDA), based on two statistical tests (distribution-free resampling) according to Moodie et al. (refer to Material&Methods section in the manuscript for references), to provide sensitivity while maintaining control over false positives.  
RBD binding IgG data captured as median fluorescent intensities (MFIs) were converted to U/mL antibody concentrations using a reference standard curve (reference standard composed of a pool of five convalescent serum samples obtained >14 days post-COVID-19 PCR diagnosis and diluted sequentially in antibody-depleted human serum) with arbitrarily assigned concentrations of 100 U/mL and accounting for the serum dilution factor.  
For SARS-CoV-2 and VSV-SARS-CoV-2 spike variant pseudovirus neutralisation assay, titers were calculated in GraphPad Prism version 8.4.2 by generating a 4-parameter (4PL) logistical fit of the percent neutralisation at each serial serum dilution. The 50% neutralisation

titre (VNT50) was reported as the interpolated reciprocal of the dilution yielding a 50% reduction in fluorescent viral foci. Cytokine profiles in PBMC supernatants were analysed using ProcartaPlex Analyst 1.0 software (Thermo Fisher Scientific). All statistical analyses were performed using GraphPad Prism software version 8.4.2.

For manuscripts utilizing custom algorithms or software that are central to the research but not yet described in published literature, software must be made available to editors/reviewers. We strongly encourage code deposition in a community repository (e.g. GitHub). See the Nature Research [guidelines for submitting code & software](#) for further information.

## Data

Policy information about [availability of data](#)

All manuscripts must include a [data availability statement](#). This statement should provide the following information, where applicable:

- Accession codes, unique identifiers, or web links for publicly available datasets
- A list of figures that have associated raw data
- A description of any restrictions on data availability

The data that support the findings of this study are available from the corresponding author upon reasonable request. SARS-CoV-2 complete genome sequences were downloaded from GISAID nucleotide database (<https://www.gisaid.org>) on March 20th, 2020 as referred in Baum et al., 2020. Upon completion of this clinical trial, summary-level results will be made public and shared in line with data sharing guidelines.

## Field-specific reporting

Please select the one below that is the best fit for your research. If you are not sure, read the appropriate sections before making your selection.

- Life sciences       Behavioural & social sciences       Ecological, evolutionary & environmental sciences

For a reference copy of the document with all sections, see [nature.com/documents/nr-reporting-summary-flat.pdf](https://www.nature.com/documents/nr-reporting-summary-flat.pdf)

## Life sciences study design

All studies must disclose on these points even when the disclosure is negative.

|                 |                                                                                                                                                                                                                                                                                                                                                                                                                                                                                                                                                                                                                                                                                                                                                                                                                                                                                                                                                                                                                                                                                                                                                                                                                                                                                                              |
|-----------------|--------------------------------------------------------------------------------------------------------------------------------------------------------------------------------------------------------------------------------------------------------------------------------------------------------------------------------------------------------------------------------------------------------------------------------------------------------------------------------------------------------------------------------------------------------------------------------------------------------------------------------------------------------------------------------------------------------------------------------------------------------------------------------------------------------------------------------------------------------------------------------------------------------------------------------------------------------------------------------------------------------------------------------------------------------------------------------------------------------------------------------------------------------------------------------------------------------------------------------------------------------------------------------------------------------------|
| Sample size     | In the part of the clinical study reported here five dose levels (1 µg, 10 µg, 30 µg, 50 µg or 60 µg) of the BNT162b1 vaccine candidate were assessed at one site in Germany with 12 healthy volunteers per dose level in a dose escalation and de-escalation design. Sentinel dosing was performed in each dose-escalation cohort. The inclusion of 12 subjects per group is considered to be adequate for a safety assessment of each vaccine per dose level. The probability to observe a particular TEAE with incidence of 15% at least once in 12 subjects per group is 85.8%.                                                                                                                                                                                                                                                                                                                                                                                                                                                                                                                                                                                                                                                                                                                          |
| Data exclusions | Clinical data available until data extraction date of 13JUL2020 were included. All participants with data available were included in the safety and immunogenicity analyses.<br>For serology/cell-mediated immunity correlation analyses (Ext. Data Fig. 4 a/b/d), data were only plotted for prime/boost vaccinated participants (excluding the 60 µg dose level cohort) with detectable T-cell response.<br>All participants with sufficient PBMC material available were included in the ICS analyses. In Fig. 4b, CD4 non-responders (<0.03% total cytokine producing T cells; 1 µg, n=5; 10 µg, n=1; 30 µg, n=2; 50 µg, n=1; 60 µg, n=6) were excluded.<br>All participants with sufficient PBMC material available were included in the ELISPOT analyses. In Fig. 3c, participants without a T-cell response were excluded, and data from the 60 µg cohort were excluded. In Ext. Data Fig. 4c, only data from participants with both CD4+ and CD8+ T-cell responses were included.<br>For cytokine analysis in Fig. 4d, only assay results from n=5 participants of the 50 µg cohort were available by the time of submission/re-submission. The remaining samples from this and other cohorts were prioritized for other analyses.<br>Data shown are preliminary and not fully source-data verified. |
| Replication     | A parallel clinical study of very similar design has been conducted in the USA involving the same populations, vaccine candidates and doses. The results for safety and immunogenicity align closely. The US study is randomized placebo controlled.<br>Serology: Participant sera were tested in duplicate and geometric mean concentration (RBD-specific IgG dLIA) or titer (virus neutralisation and pseudovirus neutralisation assay) were plotted.<br>T cell immunity: Participant PBMCs were tested as single instance in ICS analyses. Participant PBMCs were tested in duplicates in ELISpot analyses. Spot counts were summarized as mean values of each duplicate.<br>Data shown are preliminary and not fully source-data verified.                                                                                                                                                                                                                                                                                                                                                                                                                                                                                                                                                               |
| Randomization   | Randomization was not performed in order to facilitate operational efficiencies with the sentinel design, also knowing that a parallel randomized, placebo-controlled study was being conducted in the same vaccine constructs in the USA.                                                                                                                                                                                                                                                                                                                                                                                                                                                                                                                                                                                                                                                                                                                                                                                                                                                                                                                                                                                                                                                                   |
| Blinding        | This is a non-randomized open-label phase I/II trial. Investigators were not blinded in order to facilitate operational efficiencies with the sentinel design, also knowing that a parallel randomized, placebo-controlled study was being conducted in the same vaccine constructs in the USA.                                                                                                                                                                                                                                                                                                                                                                                                                                                                                                                                                                                                                                                                                                                                                                                                                                                                                                                                                                                                              |

## Reporting for specific materials, systems and methods

We require information from authors about some types of materials, experimental systems and methods used in many studies. Here, indicate whether each material, system or method listed is relevant to your study. If you are not sure if a list item applies to your research, read the appropriate section before selecting a response.

## Materials &amp; experimental systems

| n/a                                 | Involvement                                                     |
|-------------------------------------|-----------------------------------------------------------------|
| <input type="checkbox"/>            | <input checked="" type="checkbox"/> Antibodies                  |
| <input type="checkbox"/>            | <input checked="" type="checkbox"/> Eukaryotic cell lines       |
| <input checked="" type="checkbox"/> | <input type="checkbox"/> Palaeontology                          |
| <input checked="" type="checkbox"/> | <input type="checkbox"/> Animals and other organisms            |
| <input type="checkbox"/>            | <input checked="" type="checkbox"/> Human research participants |
| <input type="checkbox"/>            | <input checked="" type="checkbox"/> Clinical data               |

## Methods

| n/a                                 | Involvement                                        |
|-------------------------------------|----------------------------------------------------|
| <input checked="" type="checkbox"/> | <input type="checkbox"/> ChIP-seq                  |
| <input type="checkbox"/>            | <input checked="" type="checkbox"/> Flow cytometry |
| <input checked="" type="checkbox"/> | <input type="checkbox"/> MRI-based neuroimaging    |

## Antibodies

|                 |                                                                                                                                                                                                                                                                                                                                                                                                                                                                                                                                                                                                                                                                                                                                                                                                                                                                                                                                                                                                                                                                                                                                                                                                                                                                                                                      |
|-----------------|----------------------------------------------------------------------------------------------------------------------------------------------------------------------------------------------------------------------------------------------------------------------------------------------------------------------------------------------------------------------------------------------------------------------------------------------------------------------------------------------------------------------------------------------------------------------------------------------------------------------------------------------------------------------------------------------------------------------------------------------------------------------------------------------------------------------------------------------------------------------------------------------------------------------------------------------------------------------------------------------------------------------------------------------------------------------------------------------------------------------------------------------------------------------------------------------------------------------------------------------------------------------------------------------------------------------|
| Antibodies used | <p>Flow cytometry (specificity/host+reactivity/fluorochrome/clone/manufacture/catalogue number/lot number/dilution/extra- or intracellular):</p> <p>CD3/mouse anti-human/BV421/UCHT1/BD Biosciences/562426/9113553/1:250/extracellular+intracellular<br/>           CD4/mouse anti-human/BV480/RPA-T4/BD Biosciences/746541/0171955/1:50/extracellular+intracellular<br/>           CD8/mouse anti-human/BB515/RPA-T8/BD Biosciences/564526/0037189/1:100/extracellular+intracellular<br/>           IFN<math>\gamma</math>/mouse anti-human/PE-Cy7/B27/BD Biosciences/557643/9332967/1:50/intracellular<br/>           IL-2/rat anti-human/PE/MQ1-17H12/BD Biosciences/554566/9337013/1:10/intracellular<br/>           IL-4/rat anti-human/APC/MP4-25D2/BD Biosciences/554486/9185677/1:500/intracellular</p> <p>Fixable Viability Dye/eF780/eBioscience/65-0865-14/2185428/1:1,666</p> <p>ELISpotPro kit/cat. no. 3420-2APT-10/lot no. 370/Mabtech:<br/>           Primary anti-IFN<math>\gamma</math> antibody/clone c1-D1K/pre-coated plates<br/>           Secondary anti-IFN<math>\gamma</math> antibody/clone 7-B6-1 (ALP conjugate)/1:250<br/>           CD3/clone CD3-2/1:1,000</p> <p>RBD-binding IgG assay:<br/>           goat anti-human IgG/R-PE/polyclonal/Jackson Labs/109-115-098/147186/1:500</p> |
| Validation      | <p>Commercially available antibodies were selected based on their antigen specificity and suggested application as described on the manufacturer's website and data sheets. The antibody concentrations for staining were optimized by titrating down each reagent starting at the manufacturer's recommendation. The optimal amounts of the reagents were defined by (i) minimal unspecific shift of the negative population and (ii) a maximal separation of the negative and positive population. Individual antibody validation reports are not evident from the BD Biosciences website.</p>                                                                                                                                                                                                                                                                                                                                                                                                                                                                                                                                                                                                                                                                                                                     |

## Eukaryotic cell lines

Policy information about [cell lines](#)

|                                                                   |                                                                                                                                                                                                                                                                               |
|-------------------------------------------------------------------|-------------------------------------------------------------------------------------------------------------------------------------------------------------------------------------------------------------------------------------------------------------------------------|
| Cell line source(s)                                               | Vero cells (CCL-81), Vero E6 cells (CRL-1586) and HEK293T (CRL-3216) were obtained from ATCC.                                                                                                                                                                                 |
| Authentication                                                    | Vero and Vero E6 cells were sourced from ATCC, which maintains a quality management system commensurate to ISO 9001:2015, ISO 13485:2016, ISO 17025:2017, and ISO 17034:2016. Cells were certified by the vendor and propagated according to the manufacturer's instructions. |
| Mycoplasma contamination                                          | All used cell lines were tested negative for mycoplasma contamination after receipt and before expansion and cryopreservation.                                                                                                                                                |
| Commonly misidentified lines (See <a href="#">ICLAC</a> register) | No commonly misidentified cell lines were used.                                                                                                                                                                                                                               |

## Human research participants

Policy information about [studies involving human research participants](#)

|                            |                                                                                                                                                                                                                                                                                                                                                                                                                                                                                                                                                                                                                                                                                                                                                                                                                  |
|----------------------------|------------------------------------------------------------------------------------------------------------------------------------------------------------------------------------------------------------------------------------------------------------------------------------------------------------------------------------------------------------------------------------------------------------------------------------------------------------------------------------------------------------------------------------------------------------------------------------------------------------------------------------------------------------------------------------------------------------------------------------------------------------------------------------------------------------------|
| Population characteristics | <p>Healthy men and non-pregnant women 18 to 55 years (amended to add 56 -85 of age) of age with equal gender distribution. Most participants were Caucasian (96.7%) with one African American and one Asian subject (1.7% each). Key exclusion criteria included previous clinical or microbiological diagnosis of COVID-19; receipt of medications to prevent COVID-19; previous vaccination with any coronavirus vaccine; a positive serological test for SARS-CoV-2 IgM and/or IgG at the screening visit; and a SARS-CoV-2 NAAT-positive nasal swab within 24 hours before study vaccination; those with increased risk for severe COVID-19; immunocompromised individuals, those with known infection with HIV, hepatitis C virus, or hepatitis B virus and those with a history of autoimmune disease.</p> |
| Recruitment                | <p>Recruitment was performed by teaching investigators according to inclusion and exclusion criteria without any bias. No protocol-specified methods. The sites are experienced phase 1 units with established rosters of potential subjects who they can invite for screening for inclusion. Also the sites advertise through their own web-site. Some subjects self-referred via the sponsor.</p>                                                                                                                                                                                                                                                                                                                                                                                                              |

## Ethics oversight

The trial was carried out in Germany in accordance with the Declaration of Helsinki and Good Clinical Practice Guidelines and with approval by an independent ethics committee (Ethik-Kommission of the Landesärztekammer Baden-Württemberg, Stuttgart, Germany) and the competent regulatory authority (Paul-Ehrlich Institute, Langen, Germany). All subjects provided written informed consent.

Note that full information on the approval of the study protocol must also be provided in the manuscript.

## Clinical data

Policy information about [clinical studies](#)

All manuscripts should comply with the ICMJE [guidelines for publication of clinical research](#) and a completed [CONSORT checklist](#) must be included with all submissions.

## Clinical trial registration

ClinicalTrials.gov Identifier: NCT04380701, see also manuscript

## Study protocol

The full clinical study protocol is not published online, but a comprehensive description of the clinical trial design, eligibility criteria and endpoints is available at <https://clinicaltrials.gov/ct2/show/study/NCT04380701>.

## Data collection

Serum for antibody assays was obtained on day 1 (pre-prime), 8±1 (post-prime), 22±2 (pre-boost), 29±3 and 43±4 (post-boost). PBMCs for T cell studies were obtained on day 1 (pre-prime) and 29±3 (post-boost). Tolerability was assessed by patient diary. All formal protocol-determined visits were conducted on-site at the investigators premises (in each case a dedicated phase 1 unit). All study procedures such as blood sample, physical examinations, screening checks were conducted at the study sites. The only exceptions were the completion of the subject diaries, which was done by the subjects at home. Diaries were collected by the sites at the subjects' next scheduled visits and the data entered on site. There was also dedicated telephone follow-up, 48 hrs following dosing, to ensure subject well-being, which was documented on site by the investigator conducting the call.

## Outcomes

Primary objective: To describe the safety and tolerability profiles of prophylactic BNT162 vaccines in healthy adults after single dose (SD; prime only) or prime/boost (P/B) immunization.  
Endpoints: Solicited local reactions & solicited systemic reactions (listed in subject diaries, to be graded by subjects) and unsolicited treatment-emergent adverse events.

Secondary objectives: To describe the immune response in healthy adults after SD or P/B immunization measured by a functional antibody titer, e.g., virus neutralization test or an equivalent assay available by the time of trial conduct.

Endpoints: Functional antibody responses; fold increases in functional antibody titers; number of subjects with seroconversion

## Flow Cytometry

### Plots

Confirm that:

- The axis labels state the marker and fluorochrome used (e.g. CD4-FITC).
- The axis scales are clearly visible. Include numbers along axes only for bottom left plot of group (a 'group' is an analysis of identical markers).
- All plots are contour plots with outliers or pseudocolor plots.
- A numerical value for number of cells or percentage (with statistics) is provided.

### Methodology

## Sample preparation

Cytokine-producing T cells were identified by intracellular cytokine staining. PBMCs thawed and rested for 4 hours in OpTmizer medium supplemented with 2 µg/mL DNaseI (Roche), were restimulated with a peptide pool representing the vaccine-encoded SARS-CoV-2 RBD (2 µg/mL/peptide; JPT Peptide Technologies) in the presence of GolgiPlug (BD) for 18 hours at 37 °C. Controls were treated with DMSO-containing medium. Cells were stained for viability and surface markers in flow buffer ((DPBS (Gibco) supplemented with 2% FCS (Biochrom), 2 mM EDTA (Sigma-Aldrich)) for 20 minutes at 4 °C. Afterwards, samples were fixed and permeabilized using the Cytotfix/Cytoperm kit according to manufacturer's instructions (BD Biosciences). Intracellular staining was performed in Perm/Wash buffer for 30 minutes at 4 °C.

## Instrument

Samples were acquired on a FACS VERSE instrument (BD Biosciences).

## Software

For data analysis FlowJo software version 10.5.3 (FlowJo LLC, BD Biosciences) was used.

## Cell population abundance

Bulk PBMCs were used. No cell sorting was performed.

## Gating strategy

The gating strategies are detailed in the respective figure or in the supplementary information. Briefly, singlets were gated based on their location in the FSC-A/FSC-H plot. Debris was excluded in the subsequent FSC-A/viability dye plot. Viable cells were gated from non-debris in the FSC-A/viability dye plot. From viable cells, lymphocytes were gated based on their size and granularity in the FSC-A/SSC-A plot. From lymphocytes, CD3+ T cells were gated in the CD3/SSC-A plot. From CD3+ T cells, CD4+ and CD8+ T cells were gated in the CD4/CD8 plot. From CD4+ T cells, IFNγ+, IL-2+, IL-4+ or IFNγ+ IL-2+ T cells were gated by plotting CD4/IFNγ, CD4/IL-2, CD4/IL-4, or IFNγ/IL-2. From CD8+ T cells, IFNγ+, IL-2+ or IFNγ+ IL-2+ T cells were gated by plotting CD8/IFNγ, CD8/IL-2, or IFNγ/IL-2.

- Tick this box to confirm that a figure exemplifying the gating strategy is provided in the Supplementary Information.
